# Supplementary material for: The Influence of Kinetic Models and Attenuation Correction on Cadmium–Zinc–Telluride Single-Photon Emission Computed Tomography (CZT SPECT)-Derived Myocardial Blood Flow and Reserve: Correlation with Invasive Angiography Data
Source: MDPI journal article supplement (doi:10.3390/jcm13051271), 2024-02-23
Supplement: s1 [file s1]

Supplementary Material - Table S1. Correlation between models: global stress myocardial blood flow

| Global Stress MBF | Net Retention,<br>AC | Net Retention,<br>NC | 1-Compartment,<br>AC | 1-Compartment,<br>NC |
|-------------------|----------------------|----------------------|----------------------|----------------------|
| Net Retention, AC | 1.000                | 0.788                | 0.825                | 0.687                |
| Net Retention, NC | 0.788                | 1.000                | 0.676                | 0.793                |
| 1-Compartment, AC | 0.825                | 0.676                | 1.000                | 0.679                |
| 1-Compartment, NC | 0.687                | 0.793                | 0.679                | 1.000                |

Supplementary Material - Table S2. Correlation between models: global rest myocardial blood flow

| Global Rest MBF   | Net Retention,<br>AC | Net Retention,<br>NC | 1-Compartment,<br>AC | 1-Compartment,<br>NC |
|-------------------|----------------------|----------------------|----------------------|----------------------|
| Net Retention, AC | 1.000                | 0.743                | 0.767                | 0.621                |
| Net Retention, NC | 0.743                | 1.000                | 0.609                | 0.734                |
| 1-Compartment, AC | 0.767                | 0.609                | 1.000                | 0.624                |
| 1-Compartment, NC | 0.621                | 0.734                | 0.624                | 1.000                |

Supplementary Material - Table S3. Correlation between models: global myocardial flow reserve

| Global CFR        | Net Retention,<br>AC | Net Retention,<br>NC | 1-Compartment,<br>AC | 1-Compartment,<br>NC |
|-------------------|----------------------|----------------------|----------------------|----------------------|
| Net Retention, AC | 1.000                | 0.656                | 0.797                | 0.548                |
| Net Retention, NC | 0.656                | 1.000                | 0.551                | 0.789                |
| 1-Compartment, AC | 0.797                | 0.551                | 1.000                | 0.547                |
| 1-Compartment, NC | 0.548                | 0.789                | 0.547                | 1.000                |

Supplementary Material – Table S4. Correlation between models: global different flow

| Global DF         | Net Retention,<br>AC | Net Retention,<br>NC | 1-Compartment,<br>AC | 1-Compartment,<br>NC |
|-------------------|----------------------|----------------------|----------------------|----------------------|
| Net Retention, AC | 1.000                | 0.694                | 0.833                | 0.596                |
| Net Retention, NC | 0.694                | 1.000                | 0.600                | 0.817                |
| 1-Compartment, AC | 0.833                | 0.600                | 1.000                | 0.617                |
| 1-Compartment, NC | 0.596                | 0.817                | 0.617                | 1.000                |

Supplementary Material – Table S5. Association between CA obstruction and CZT SPECT data (*logistic regression analysis*)

| Stress MBF                     | OR   | 95% CI       | p      | AUC,  | AUC, p  | AUC, 95%CI  |
|--------------------------------|------|--------------|--------|-------|---------|-------------|
| <i>ICA</i>                     |      |              |        |       |         |             |
| <i>Patient based (global)</i>  |      |              |        |       |         |             |
| 1TCM_AC                        | 0.62 | (0.44-0.87)  | 0.006  | 0.63  | 0.001   | 0.559-0.697 |
| 1TCM_NAC                       | 0.47 | (0.29-0.78)  | 0.003  | 0.64  | 0.0007  | 0.56-0.71   |
| NR_AC                          | 0.49 | (0.30-0.78)  | 0.003  | 0.64  | 0.0004  | 0.57-0.71   |
| NR_NAC                         | 0.70 | (0.46-1.07)  | 0.099  | 0.57  | 0.0241  | 0.52-0.669  |
| <i>Vessel based (regional)</i> |      |              |        |       |         |             |
| 1TCM_AC                        | 0.73 | (0.62-0.85)  | <0.001 | 0.62  | <0,0001 | 0.58-0.66   |
| 1TCM_NAC                       | 0.46 | (0.35-0.599) | <0.001 | 0.655 | <0,0001 | 0.61-0.695  |
| NR_AC                          | 0.45 | (0.34-0.59)  | <0.001 | 0.65  | <0,0001 | 0.62-0.69   |
| NR_NAC                         | 0.67 | (0.53-0.84)  | <0.001 | 0.62  | <0,0001 | 0.575-0.66  |
| <i>FFR (only regional)</i>     |      |              |        |       |         |             |
| 1TCM_AC                        | 0.67 | (0.362-1.25) | 0.208  | 0.63  | 0.20    | 0.48-0.78   |
| 1TCM_NAC                       | 0.57 | (0.26-1.24)  | 0.156  | 0.64  | 0.138   | 0.47-0.79   |
| NR_AC                          | 0.08 | (0.01-0.57)  | 0.011  | 0.815 | 0.0003  | 0.65-0.925  |
| NR_NAC                         | 0.32 | (0.11-0.935) | 0.037  | 0.71  | 0.02    | 0.54-0.85   |

| CFR                           | OR   | 95% CI      | p     | AUC, | AUC, p | AUC, 95%CI |
|-------------------------------|------|-------------|-------|------|--------|------------|
| <i>ICA</i>                    |      |             |       |      |        |            |
| <i>Patient based (global)</i> |      |             |       |      |        |            |
| 1TCM_AC                       | 0.64 | (0.48-0.85) | 0.002 | 0.65 | <0.001 | 0.58-0.715 |

|                                |       |              |        |       |         |            |
|--------------------------------|-------|--------------|--------|-------|---------|------------|
| 1TCM_NAC                       | 0.79  | (0.59-1.07)  | 0.123  | 0.64  | 0.001   | 0.56-0.71  |
| NR_AC                          | 0.755 | (0.57-1.0)   | 0.052  | 0.59  | 0.023   | 0.52-0.62  |
| NR_NAC                         | 0.615 | (0.44-0.86)  | 0.005  | 0.64  | 0.001   | 0.56-0.71  |
| <i>Vessel based (regional)</i> |       |              |        |       |         |            |
| 1TCM_AC                        | 0.65  | (0.55-0.78)  | <0.001 | 0.63  | <0,0001 | 0.59-0.665 |
| 1TCM_NAC                       | 0.60  | (0.49-0.74)  | <0.001 | 0.64  | <0,0001 | 0.60-0.68  |
| NR_AC                          | 0.67  | (0.56-0.798) | <0.001 | 0.62  | <0,0001 | 0.58-0.655 |
| NR_NAC                         | 0.585 | (0.47-0.72)  | <0.001 | 0.64  | <0,0001 | 0.597-0.68 |
| <i>FFR (only regional)</i>     |       |              |        |       |         |            |
| 1TCM_AC                        | 0.53  | (0.25-1.11)  | 0.092  | 0.745 | 0.01    | 0.56-0.87  |
| 1TCM_NAC                       | 0.68  | (0.42-1.1)   | 0.118  | 0.64  | 0.085   | 0.499-0.82 |
| NR_AC                          | 0.34  | (0.14-0.80)  | 0.014  | 0.79  | <0.0001 | 0.66-0.93  |
| NR_NAC                         | 0.54  | (0.26-1.14)  | 0.106  | 0.67  | 0.0198  | 0.54-0.85  |

| DF                             | OR    | 95% CI       | p      | AUC,  | AUC, p  | AUC, 95%CI  |
|--------------------------------|-------|--------------|--------|-------|---------|-------------|
| <i>ICA</i>                     |       |              |        |       |         |             |
| <i>Patient based (global)</i>  |       |              |        |       |         |             |
| 1TCM_AC                        | 0.55  | (0.37-0.81)  | 0.003  | 0.65  | 0.0002  | 0.575-0.715 |
| 1TCM_NAC                       | 0.52  | (0.285-0.94) | 0.032  | 0.63  | 0.0025  | 0.55-0.70   |
| NR_AC                          | 0.49  | (0.286-0.84) | 0.009  | 0.635 | 0.0008  | 0.56-0.70   |
| NR_NAC                         | 0.61  | (0.35-1.07)  | 0.084  | 0.61  | 0.01    | 0.535-0.69  |
| <i>Vessel based (regional)</i> |       |              |        |       |         |             |
| 1TCM_AC                        | 0.65  | (0.54-0.77)  | <0.001 | 0.65  | <0,0001 | 0.61-0.69   |
| 1TCM_NAC                       | 0.43  | (0.31-0.59)  | <0.001 | 0.67  | <0,0001 | 0.63-0.71   |
| NR_AC                          | 0.46  | (0.345-0.62) | <0.001 | 0.645 | <0,0001 | 0.61-0.68   |
| NR_NAC                         | 0.47  | (0.34-0.66)  | <0.001 | 0.64  | <0,0001 | 0.60-0.68   |
| <i>FFR (only regional)</i>     |       |              |        |       |         |             |
| 1TCM_AC                        | 0.499 | (0.23-1.07)  | 0.075  | 0.72  | 0.0034  | 0.59-0.89   |
| 1TCM_NAC                       | 0.64  | (0.28-1.44)  | 0.276  | 0.63  | 0.081   | 0.49-0.81   |
| NR_AC                          | 0.165 | (0.04-0.655) | 0.011  | 0.82  | <0,0001 | 0.695-0.95  |
| NR_NAC                         | 0.41  | (0.15-1.11)  | 0.079  | 0.73  | 0.0086  | 0.56-0.86   |

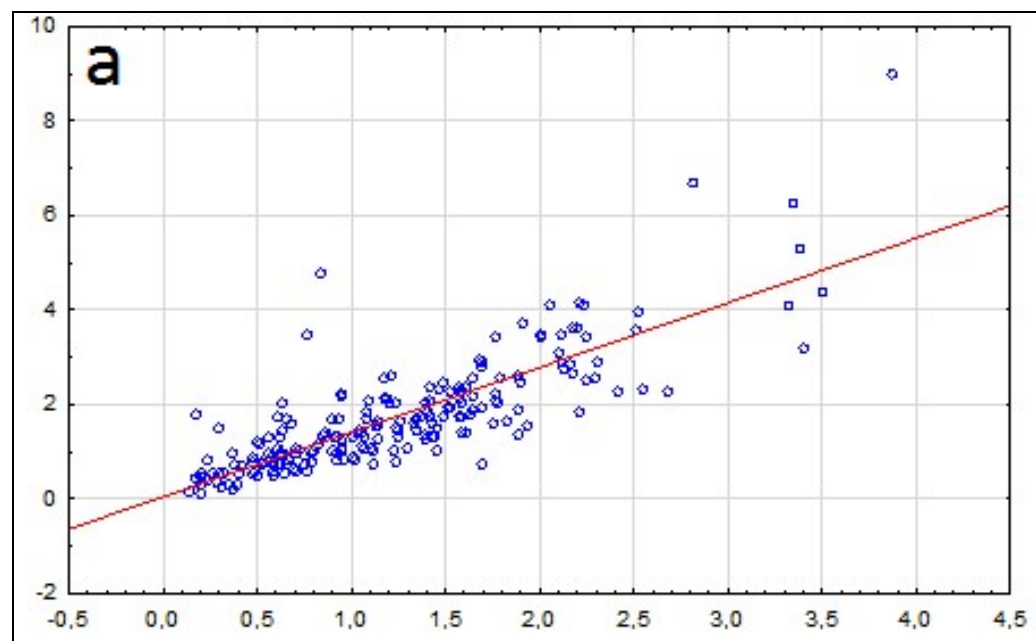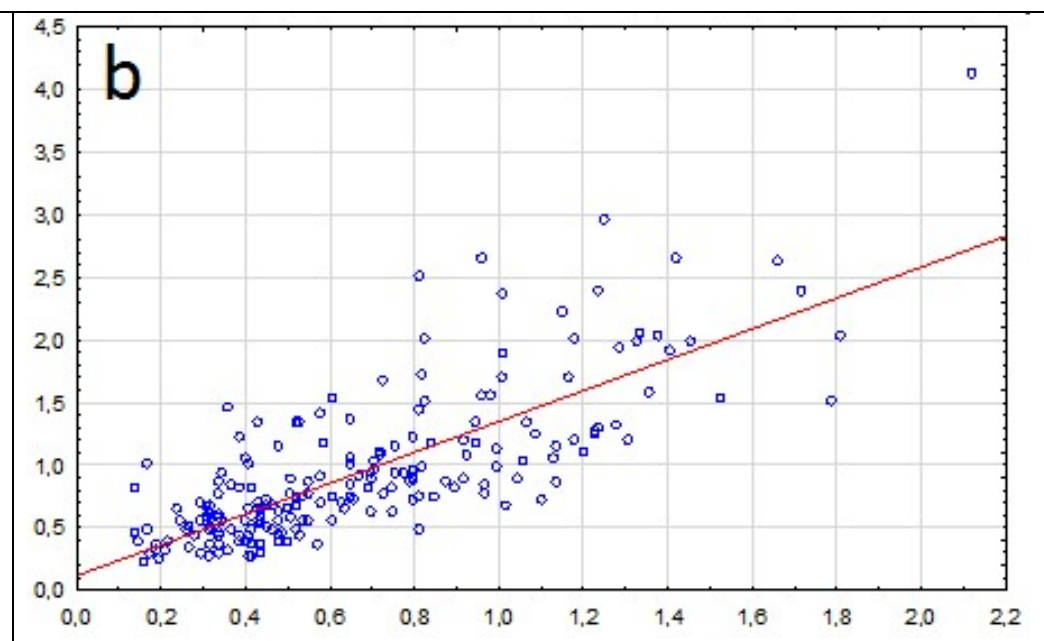

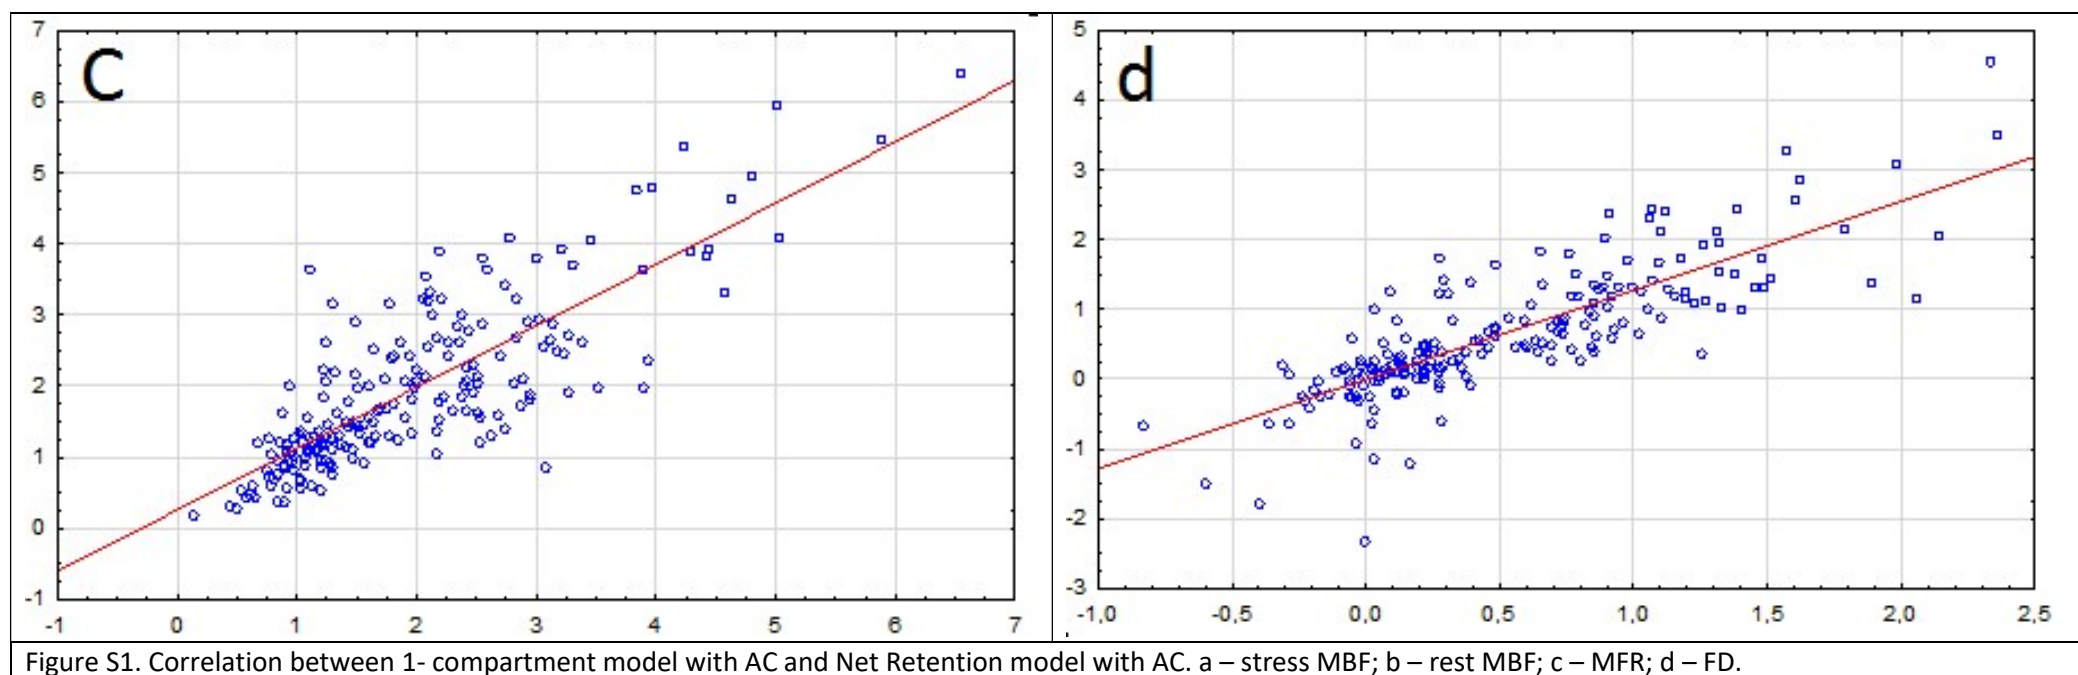

Figure S1. Correlation between 1- compartment model with AC and Net Retention model with AC. a – stress MBF; b – rest MBF; c – MFR; d – FD.

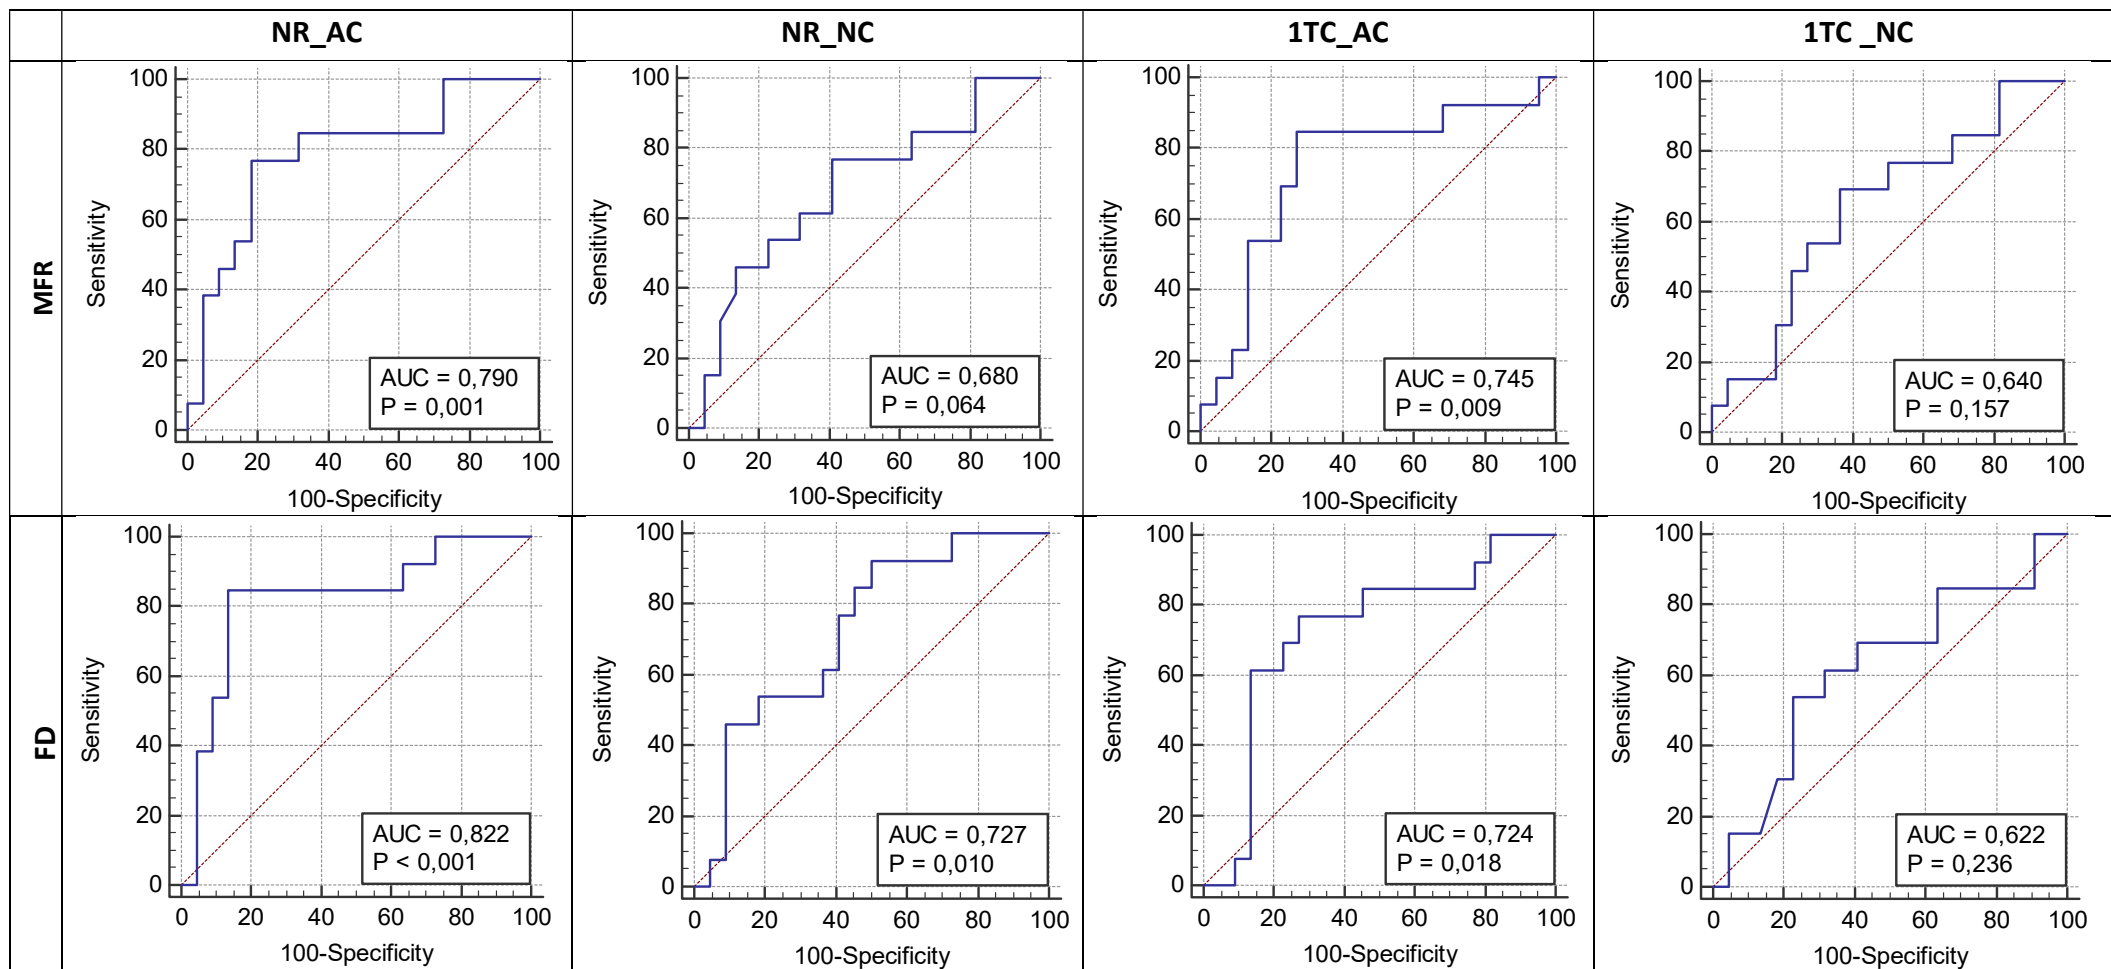

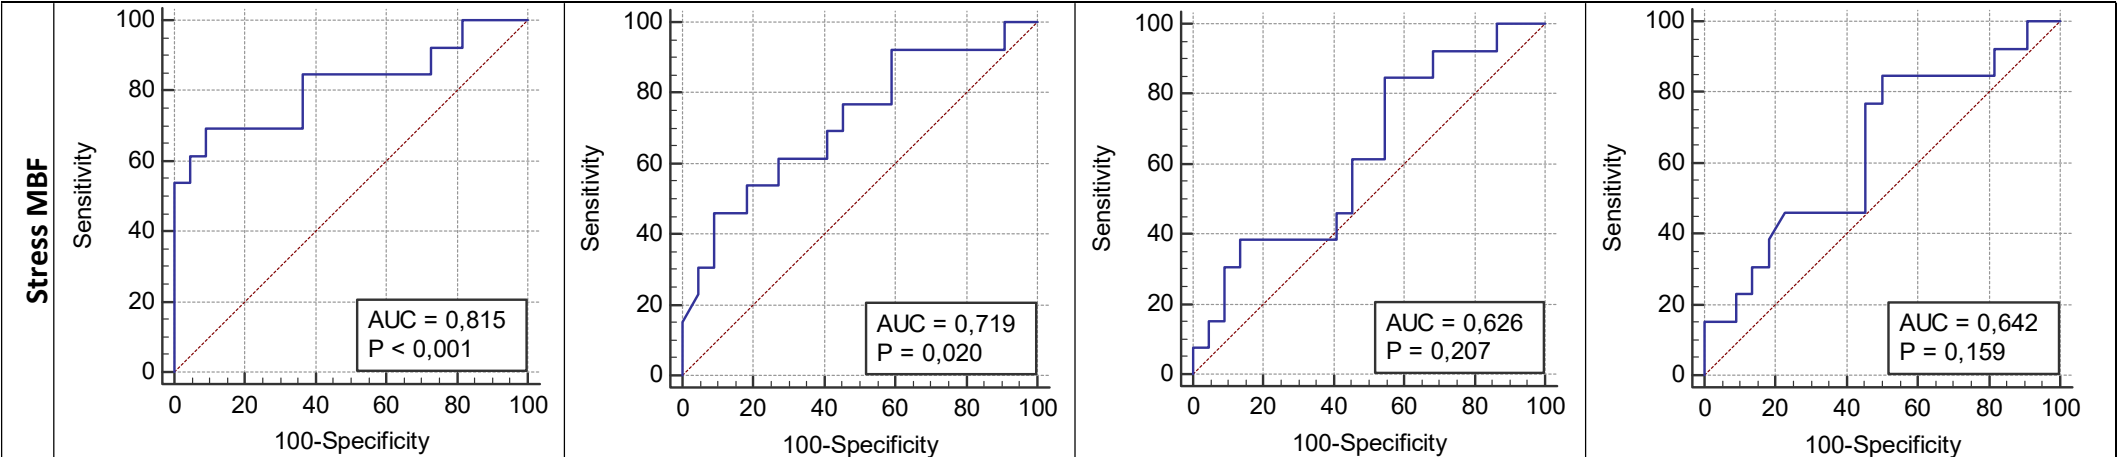

Figure S2. ROC-analysis of regional quantitative indices of dynamic SPECT. The «gold standard» is FFR.

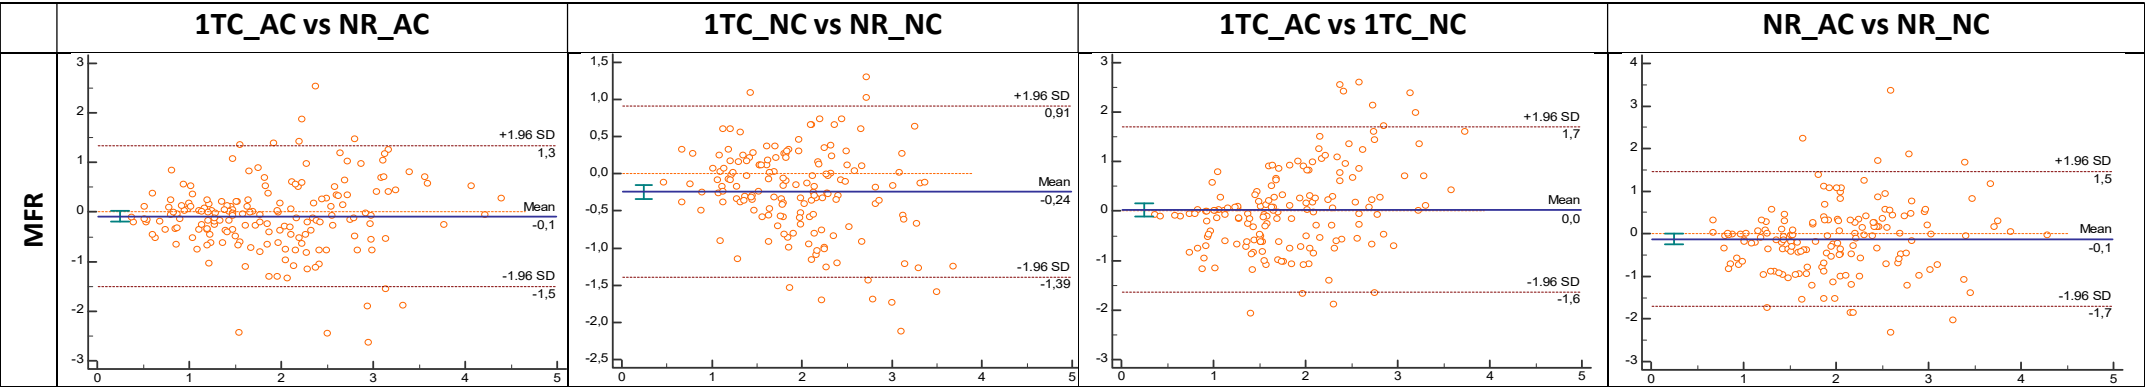

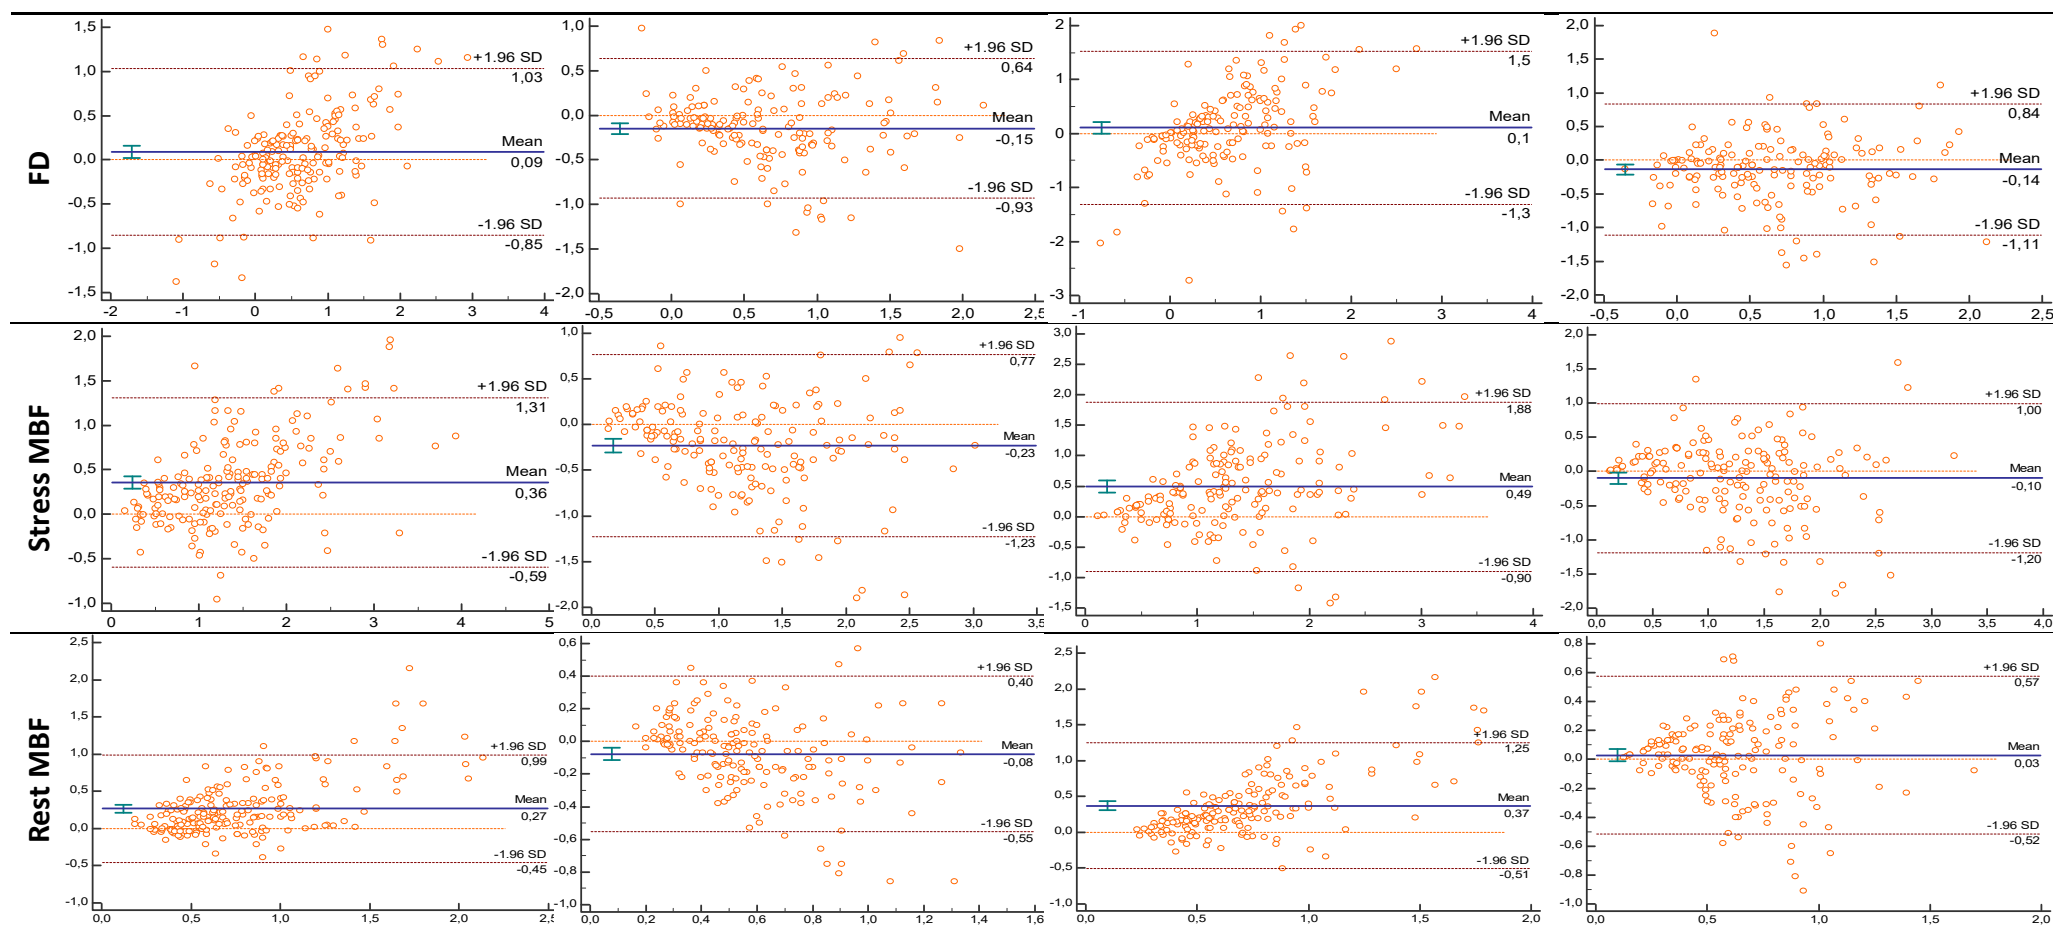

Figure S3. Bland-Altman comparison between models plot.
